# Supplementary material
Source: PubMed Central journal article supplement (PMC5808779)
Supplement: 10.1074_M117.778399_jbc.M117.778399-1.pdf [file 10.1074_M117.778399_jbc.M117.778399-1.pdf]

Table S1. Reactions and parameters in simple models

| No.      | Mathematical representation         | Reaction                                                                           | Parameters                                | Unit           | Reference | Description                                                    |
|----------|-------------------------------------|------------------------------------------------------------------------------------|-------------------------------------------|----------------|-----------|----------------------------------------------------------------|
| v1       | $kf1 \cdot x1 \cdot x9$             | $\text{ErbB3} + \text{ErbB2} \rightarrow \text{ErbB3\_ErbB2}$                      | $1.81E-04$                                | /molecules/min | estimated | HRG binding to ErbB3 monomer                                   |
| v2       | $kr1 \cdot x2$                      | $\text{ErbB3\_ErbB2} \rightarrow \text{ErbB3} + \text{ErbB2}$                      | 20                                        | /min           | estimated | Dissociation of HRG from ErbB3 monomer                         |
| v3       | $kf2 \cdot \text{hrg} \cdot x1$     | $\text{ErbB3} + [\text{HRG}] \rightarrow \text{HRG:ErbB3}$                         | 0.125                                     | /uM/min        | estimated | HRG binding to ErbB3 monomer                                   |
| v4       | $kr2 \cdot x3$                      | $\text{HRG:ErbB3} \rightarrow \text{ErbB3} + [\text{HRG}]$                         | 20                                        | /min           | estimated | Dissociation of HRG from ErbB3 monomer                         |
| v5       | $kf22 \cdot \text{hrg} \cdot x2$    | $\text{ErbB3\_ErbB2} + [\text{HRG}] \rightarrow \text{HRG:ErbB3\_ErbB2}$           | 6                                         | /uM/min        | estimated | HRG binding to ErbB3_ErbB2 dimer                               |
| v6       | $kr2 \cdot x4$                      | $\text{HRG:ErbB3\_ErbB2} \rightarrow \text{ErbB3\_ErbB2} + [\text{HRG}]$           | 20                                        | /min           | estimated | Dissociation of HRG from ErbB3_ErbB2 dimer                     |
| v7       | $kf3 \cdot x3 \cdot x9$             | $\text{HRG:ErbB3} + \text{ErbB2} \rightarrow \text{HRG:ErbB3\_ErbB2}$              | $8.68E-03$                                | /molecules/min | estimated | Dimer formation of HRG-bound ErbB3 and ErbB2                   |
| v8       | $kr3 \cdot x4$                      | $\text{HRG:ErbB3\_ErbB2} \rightarrow \text{HRG:ErbB3} + \text{ErbB2}$              | 20                                        | /min           | estimated | Dissociation of ErbB2 from ErbB3_ErbB2 dimer                   |
| v9       | $V4 \cdot x4 / (Km4 + x4)$          | $\text{HRG:ErbB3\_ErbB2} \rightarrow \text{pErbB3\_pErbB2}$                        | $V4 = 2000$<br>$Km4 = 2000$               | molecules      | estimated | Autophosphorylation of HRG-binding ErbB3_ErbB2 dimer           |
| v10      | $k5 \cdot x5 \cdot x8 / (Km5 + x5)$ | $\text{pErbB3\_pErbB2} \rightarrow \text{HRG:ErbB3\_ErbB2}$                        | $k5 = 1.6$<br>$Km5 = 4000$                | molecules      | estimated | Dephosphorylation of pErbB3_pErbB2 mediated by PTPN            |
| v11      | $kf6 \cdot x5 \cdot x5$             | $\text{pErbB3\_pErbB2} \cdot 2 \rightarrow (\text{pErbB3\_pErbB2})_2$              | 0.002                                     | /molecules/min | estimated | Tetramer formation of pErbB3_pErbB3 dimers                     |
| v12      | $kr6 \cdot x6$                      | $(\text{pErbB3\_pErbB2})_2 \rightarrow \text{pErbB3\_pErbB2} \cdot 2$              | 4                                         | /min           | estimated | Dissociation of tetramer                                       |
| v13      | $ks7$                               | $\rightarrow \text{PHLDA1 synthesis}$                                              | $[\text{initial } x7] \cdot kd7 \uparrow$ | molecules/min  | estimated | Basal synthesis of PHLDA1                                      |
| v14      | $ks7d \cdot x5 + ks7dd \cdot x6$    | $\text{pErbB3\_pErbB2} \& (\text{pErbB3\_pErbB2})_2 \rightarrow \text{PHLDA1 syr}$ | $ks7d = 0.04$<br>$ks7dd = 0.04$           | /min           | estimated | Synthesis of PHLDA1 promoted by pAkt and c-Fos                 |
| v15      | $kd7 \cdot x7$                      | $\text{PHLDA1} \rightarrow \text{degradation}$                                     | 0.02                                      | /min           | estimated | Degradation of PHLDA1                                          |
| v16      | $ks8 \cdot x5 + ks8d \cdot x6$      | $\text{pErbB3\_pErbB2} \& (\text{pErbB3\_pErbB2})_2 \rightarrow \text{PTPN synth}$ | $ks8 = 0.04$<br>$ks8d = 0.4$              | /min           | estimated | Synthesis of PTPN promoted by pErbB3_pErbB2 dimer and tetramer |
| v17      | $kd8 \cdot x8$                      | $\text{PTPN} \rightarrow \text{degradation}$                                       | 0.02                                      | /min           | estimated | Degradation of PTPN                                            |
| Feedback | $1 - x7 / (ki + x7)$                | Negative feedback from PHLDA1                                                      | 6000                                      | molecules      | estimated |                                                                |

† Synthetic constants of DUSP and PHLDA1 were calculated from randomly selected initial values in the simulation with cell-to-cell variability.

Table S2. Initial concentration of molecules in simple models

| <b>Symbol</b> | <b>Species</b>              | <b>Molecules/cell</b> | <b>Reference</b>                     |
|---------------|-----------------------------|-----------------------|--------------------------------------|
| HRG           | Concentration of HRG        | 10 (uM)               | Experimental condition in this study |
| y1            | HRGR                        | 10000                 | estimated based on [1]               |
| y2            | HRGR_ErbB2                  | 0                     |                                      |
| y3            | HRG:HRGR                    | 0                     |                                      |
| y4            | HRG:HRGR_ErbB2              | 0                     |                                      |
| y5            | pHRGR_pErbB2                | 0                     |                                      |
| y6            | (pHRGR_pErbB2) <sub>2</sub> | 0                     |                                      |
| y7            | PHLDA1                      | 6000                  | estimated                            |
| y8            | Phosphatase                 | 0                     |                                      |
| y9            | ErbB2                       | 8000                  | estimated based on [1]               |

[1] Zhang, Q., Park, E., Kani, K., and Landgraf, R. (2012). Proc. Natl. Acad. Sci. USA 109, 13237–13242

Table S3. CV of molecules in simple models

| <b>Species</b> | <b>CV of protein concentrations (%)</b> | <b>Reference</b>                             |
|----------------|-----------------------------------------|----------------------------------------------|
| HRGR           | 31                                      | estimated by measuring CV of ErbB3 (Fig. 3D) |
| ErbB2          | 40                                      | measured in this study (Fig. 3D)             |
| PHLDA1         | 100                                     |                                              |

Table S4. Rank correlations in simple models

| <b>Species</b> | <b>Rank correlation</b> | <b>Reference</b>                                                         |
|----------------|-------------------------|--------------------------------------------------------------------------|
| HRGR-PHLDA1    | 0.13                    | estimated by measuring rank correlation between ErbB3 & PHLDA1 (Fig. 3F) |
| ErbB2-PHLDA1   | 0.25                    | measured in this study (Fig. 3F)                                         |

Table S5. Negative feedback from PHLDA1 in simple models

| Name     | Reactions inhibited<br>by negative<br>feedback from<br>PHLDA1 | Description                                |
|----------|---------------------------------------------------------------|--------------------------------------------|
| Model M0 | -                                                             | No feedback from PHLDA1                    |
| Model M1 | v1 and v7                                                     | Inhibition of dimer formation              |
| Model M2 | v9                                                            | Inhibition of phosphorylation              |
| Model M3 | v11                                                           | Inhibition of tetramer formation           |
| Model M4 | v1, v7 and v11                                                | Inhibition of dimer and tetramer formation |

Table S6. Reactions and parameters in the expanded model

| No.                                                           | Reaction                                          | Mathematical representation                           | Parameters | Value                | Unit                      | Reference | Description                                                                  |
|---------------------------------------------------------------|---------------------------------------------------|-------------------------------------------------------|------------|----------------------|---------------------------|-----------|------------------------------------------------------------------------------|
| <b>Complex formation of ErbB receptors</b>                    |                                                   |                                                       |            |                      |                           |           |                                                                              |
| v1                                                            | HRGR + ErbB2 → HRGR_ErbB2                         | $kb0\_1 y1^y59 + kb0\_2 y1^y59 \cdot ki / (ki + y57)$ | kb0_1      | 2.34.E-04            | /molecules/s              | fitted    | Dimer formation of HRGR and ErbB2 inhibited by PHLDA1 (this study)           |
| v2                                                            | HRGR_ErbB2 → HRGR + ErbB2                         | $kd0^y2$                                              | kb0_2      | 2.71.E-05            | /molecules/s              | fitted    |                                                                              |
| v3                                                            | HRGR(+HRG) → HRG+HRGR                             | $kd1^y1 \cdot HRG$                                    | kd0        | 4.19.E-07            | molecules                 | fitted    | Dissociation of ErbB2 from HRGR_ErbB2 dimer                                  |
| v4                                                            | HRG.HRGR → HRGR(+HRG)                             | $kd1^y3$                                              | kd1        | 3.37.E+01            | μM/s                      | fitted    | HRG binding to HRGR monomer                                                  |
| v5                                                            | HRGR_ErbB2(+HRG) → HRG+HRGR_ErbB2                 | $kd1^y2 \cdot HRG$                                    | kd1^y3     | 1.10.E+04            | /s                        | fitted    | Dissociation of HRG from HRGR monomer                                        |
| v6                                                            | HRGR.HRGR_ErbB2 → HRGR_ErbB2(+HRG)                | $kd1^y4$                                              | kd1        | 3.37.E+01            | μM/s                      | fitted    | HRG binding to HRGR_ErbB2 dimer                                              |
| v7                                                            | HRG.HRGR + ErbB2 → HRG.HRGR_ErbB2                 | $kdim1^y3 + kdim2^y3 \cdot ki / (ki + y57)$           | kdim1      | 1.10.E+04            | /s                        | fitted    | Dissociation of HRG from HRGR_ErbB2 dimer                                    |
| v8                                                            | HRG.HRGR_ErbB2 → HRG.HRGR + ErbB2                 | $kmono^y4$                                            | kdim2      | 4.85.E-03            | /molecules/s              | fitted    | Dimer formation of HRG-bound HRGR and ErbB2 inhibited by PHLDA1 (this study) |
| v9                                                            | HRG.HRGR_ErbB2 → pHRGR_ErbB2                      | $kmno^y4$                                             | ki         | 4.19.E+07            | molecules                 | fitted    |                                                                              |
| v10                                                           | pHRGR_pErbB2 → HRG.HRGR_ErbB2                     | $k2^y58^y5 / (km2 + y5)$                              | kmono      | 8.60.E+00            | /s                        | fitted    | Dissociation of ErbB2 from HRG-binding HRGR_ErbB2 dimer                      |
| v11                                                           | pHRGR_pErbB2 *2 → pHRGR_pErbB2_2                  | $ktet1^y5^y5 + ktet2^y5^y5 \cdot ki / (ki + y57)$     | ktet1      | 1.00.E-02            | /molecules/s              | fitted    | Autophosphorylation of HRG-binding HRGR_ErbB2 dimer                          |
| v12                                                           | pHRGR_pErbB2_2 → pHRGR_pErbB2 *2                  | $kdim^y3d$                                            | ktet2      | 3.20.E+01            | /molecules/s              | fitted    | Tetramer formation of pHRGR_pHRGR dimers inhibited by PHLDA1 (this study)    |
| v13                                                           | pHRGR_pErbB2_P13K → pHRGR_pErbB2_P13K             | $kf3^y5^y7$                                           | ki         | 4.19.E+07            | molecules                 | fitted    |                                                                              |
| v14                                                           | pHRGR_pErbB2_P13K → pHRGR_pErbB2+P13K             | $kr3^y8$                                              | kdim       | 8.98.E+01            | /s                        | fitted    | Dissociation of tetramer                                                     |
| v15                                                           | pHRGR_pErbB2_P13K → pHRGR_pErbB2+P13KA            | $kc3^y8$                                              |            |                      |                           |           |                                                                              |
| v16                                                           | pHRGR_pErbB2_2+P13K → pHRGR_pErbB2_2+P13K         | $kf3^y6^y7$                                           | kf3        | 1.08E-01             | /molecules/s              | fitted    | Phosphorylation of P13K by pHRGR_pErbB2 dimer                                |
| v17                                                           | pHRGR_pErbB2_2_P13K → pHRGR_pErbB2_2+P13K         | $kr3^y9$                                              | kr3        | 1.62E+02             | /s                        | fitted    |                                                                              |
| v18                                                           | pHRGR_pErbB2_2_P13K → pHRGR_pErbB2_2+P13KA        | $kc3^y9$                                              | kc3        | 4.40E+00             | /s                        | fitted    |                                                                              |
| v19                                                           | PIP2 + PI3KA → PIP2 + PI3KA                       | $kf4^y10^y11$                                         | kf4        | 1.28E-03             | /molecules/s              | fitted    | Phosphorylation of PIP2 by PI3K                                              |
| v20                                                           | PIP3A_PIP2 → PIP2 + PI3KA                         | $kr4^y12$                                             | kr4        | 1.38E+02             | /s                        | fitted    |                                                                              |
| v21                                                           | PIP3A_PIP2 → PIP3 + PI3KA                         | $kc4^y12$                                             | kc4        | 1.90E+01             | /s                        | fitted    |                                                                              |
| v22                                                           | PIP3 + PDK1 → PIP3 + PDK1                         | $kf5^y13^y14$                                         | kf5        | 1.68E-04             | /molecules/s              | fitted    | Phosphorylation of PDK1                                                      |
| v23                                                           | PIP3_PDK1 → PIP3 + PDK1                           | $kr5^y15$                                             | kr5        | 3.05E+02             | /s                        | fitted    |                                                                              |
| v24                                                           | PIP3_PDK1 → PIP3 + p-PDK1                         | $kc5^y15$                                             | kc5        | 3.45E+02             | /s                        | fitted    |                                                                              |
| v25                                                           | p-PDK1 + Akt → p-PDK1 + Akt                       | $kf6^y16^y17$                                         | kf6        | 5.02E-03             | /molecules/s              | fitted    | Phosphorylation of Akt by PDK1                                               |
| v26                                                           | p-PDK1_Akt → p-PDK1 + Akt                         | $kr6^y18$                                             | kr6        | 3.81E+02             | /s                        | fitted    |                                                                              |
| v27                                                           | p-PDK1_Akt → p-PDK1 + p-Akt                       | $kc6^y18$                                             | kc6        | 1.17E+03             | /s                        | fitted    |                                                                              |
| v28                                                           | PI3KA + Pase1 → PI3KA + Pase1                     | $kf7^y19^y20$                                         | kf7        | 7.16E-04             | /molecules/s              | fitted    | Dephosphorylation of PI3K                                                    |
| v29                                                           | Pase1_P13KA → PI3KA + Pase1                       | $kr7^y21$                                             | kr7        | 3.67E+01             | /s                        | fitted    |                                                                              |
| v30                                                           | Pase1_P13KA → PI3K + Pase1                        | $kc7^y21$                                             | kc7        | 4.34E+00             | /s                        | fitted    |                                                                              |
| v31                                                           | PIP3 + PTEN → PIP2 + PTEN                         | $kf8^y13^y22$                                         | kf8        | 6.56E-03             | /molecules/s              | fitted    | Dephosphorylation of PIP3 by PTEN                                            |
| v32                                                           | PTEN_PIP3 → PIP2 + PTEN                           | $kr8^y23$                                             | kr8        | 1.21E+02             | /s                        | fitted    |                                                                              |
| v33                                                           | PTEN_PIP3 → PIP2 + PTEN                           | $kc8^y23$                                             | kc8        | 1.11E+02             | /s                        | fitted    |                                                                              |
| v34                                                           | p-PDK1 + Pase2 → p-PDK1 + Pase2                   | $kf9^y18^y24$                                         | kf9        | 4.30E-03             | /molecules/s              | fitted    | Dephosphorylation of PDK                                                     |
| v35                                                           | Pase2_p-PDK1 → p-PDK1 + Pase2                     | $kr9^y25$                                             | kr9        | 1.53E+01             | /s                        | fitted    |                                                                              |
| v36                                                           | Pase2_p-PDK1 → PDK1 + Pase2                       | $kc9^y25$                                             | kc9        | 1.68E+02             | /s                        | fitted    |                                                                              |
| v37                                                           | p-Akt + PP2A → p-Akt + PP2A                       | $kf10^y19^y26$                                        | kf10       | 1.12E-03             | /molecules/s              | fitted    | Dephosphorylation of pAkt by PP2A                                            |
| v38                                                           | PP2A_p-Akt → p-Akt + PP2A                         | $kr10^y27$                                            | kr10       | 1.16E+02             | /s                        | fitted    |                                                                              |
| v39                                                           | PP2A_p-Akt → Akt + PP2A                           | $kc10^y27$                                            | kc10       | 5.22E+00             | /s                        | fitted    |                                                                              |
| <b>Ras-ERK pathway</b>                                        |                                                   |                                                       |            |                      |                           |           |                                                                              |
| v40                                                           | pErbB2_pHRGR+RasGDP → p-ErbB + RasGDP             | $kf11^y5^y28$                                         | kf11       | 2.41E-01             | /molecules/s              | fitted    | Activation of RasGDP by pHRGR_pErbB2 dimer                                   |
| v41                                                           | pHRGR_pErbB2_RasGDP → p-ErbB + RasGDP             | $kr11^y29$                                            | kr11       | 2.32E+03             | /s                        | fitted    |                                                                              |
| v42                                                           | pHRGR_pErbB2_RasGDP → p-ErbB + RasGTP             | $kc11^y29$                                            | kc11       | 5.54E+02             | /s                        | fitted    |                                                                              |
| v43                                                           | (pErbB2_pHRGR)_2+RasGDP → (pErbB2_pHRGR)_2+RasGDP | $kf11^y6^y28$                                         | kf11       | 2.41E-01             | /molecules/s              | fitted    | Activation of RasGDP by pHRGR_pErbB2 tetramer                                |
| v44                                                           | (pHRGR_pErbB2)_2_RasGDP → (pErbB2_pHRGR)_2+RasGDP | $kr11^y30$                                            | kr11       | 2.32E+03             | /s                        | fitted    |                                                                              |
| v45                                                           | (pHRGR_pErbB2)_2_RasGDP → (pErbB2_pHRGR)_2+RasGTP | $kc11^d^y30$                                          | kc11d      | 1.39E+04             | /s                        | fitted    |                                                                              |
| v46                                                           | RasGTP → RasGDP                                   | $k12^y31$                                             | k12        | 3.76E+03             | /s                        | fitted    | Inactivation of RasGTP                                                       |
| v47                                                           | RasGTP + Raf → RasGTP + Raf                       | $kf13^y31^y32$                                        | kf13       | 3.32E-02             | /molecules/s              | fitted    | Activation of Raf by RasGTP                                                  |
| v48                                                           | RasGTP_Raf → RasGTP + Raf                         | $kr13^y33$                                            | kr13       | 8.04E+01             | /s                        | fitted    |                                                                              |
| v49                                                           | RasGTP_Raf → RasGDP + p-Raf                       | $kc13^y33$                                            | kc13       | 6.17E+02             | /s                        | fitted    |                                                                              |
| v50                                                           | p-Raf + MEK → p-Raf + MEK                         | $kf14^y34^y35$                                        | kf14       | 5.36E-03             | /molecules/s              | fitted    | Phosphorylation of MEK by Raf                                                |
| v51                                                           | p-Raf_MEK → p-Raf + MEK                           | $kr14^y36$                                            | kr14       | 1.46E+03             | /s                        | fitted    |                                                                              |
| v52                                                           | p-Raf_MEK → p-Raf + p-MEK                         | $kc14^y36$                                            | kc14       | 5.79E+04             | /s                        | fitted    |                                                                              |
| v53                                                           | p-Raf + p-MEK → p-Raf + p-MEK                     | $kf15^y34^y37$                                        | kf15       | 1.32E-01             | /molecules/s              | fitted    | Phosphorylation of p-MEK by Raf                                              |
| v54                                                           | p-Raf_p-MEK → p-Raf + p-MEK                       | $kr15^y38$                                            | kr15       | 4.45E+03             | /s                        | fitted    |                                                                              |
| v55                                                           | p-Raf_p-MEK → p-Raf + p-MEK                       | $kc15^y38$                                            | kc15       | 7.00E+03             | /s                        | fitted    |                                                                              |
| v56                                                           | pp-MEK + ERK → pp-MEK + ERK                       | $kf16^y39^y40$                                        | kf16       | 1.81E-03             | /molecules/s              | fitted    | Phosphorylation of ERK by MEK                                                |
| v57                                                           | pp-MEK_ERK → pp-MEK + ERK                         | $kr16^y41$                                            | kr16       | 8.46E+02             | /s                        | fitted    |                                                                              |
| v58                                                           | pp-MEK_ERK → pp-MEK + p-ERK                       | $kc16^y41$                                            | kc16       | 1.80E+02             | /s                        | fitted    |                                                                              |
| v59                                                           | pp-MEK + p-ERK → pp-MEK + p-ERK                   | $kf17^y39^y42$                                        | kf17       | 1.78E-02             | /molecules/s              | fitted    | Phosphorylation of p-ERK by MEK                                              |
| v60                                                           | pp-MEK_p-ERK → pp-MEK + p-ERK                     | $kr17^y43$                                            | kr17       | 1.50E+01             | /s                        | fitted    |                                                                              |
| v61                                                           | pp-MEK_p-ERK → pp-MEK + pp-ERK                    | $kc17^y43$                                            | kc17       | 1.01E+02             | /s                        | fitted    |                                                                              |
| v62                                                           | RSK + pp-ERK → RSK + pp-ERK                       | $kf18^y44^y45$                                        | kf18       | 5.20E-05             | /molecules/s              | fitted    | Phosphorylation of RSK by ERK                                                |
| v63                                                           | RSK_pp-ERK → RSK + pp-ERK                         | $kr18^y46$                                            | kr18       | 3.25E+02             | /s                        | fitted    |                                                                              |
| v64                                                           | RSK_pp-ERK → p-RSK + pp-ERK                       | $kc18^y46$                                            | kc18       | 4.08E+00             | /s                        | fitted    |                                                                              |
| v65                                                           | p-RSK → RSK                                       | $k19^y47$                                             | k19        | 1.12E+01             | /s                        | fitted    | Dephosphorylation of RSK                                                     |
| v66                                                           | p-Raf + Pase3 → p-Raf + Pase3                     | $kf20^y34^y48$                                        | kf20       | 2.15E-01             | /molecules/s              | fitted    | Deactivation of p-Raf                                                        |
| v67                                                           | Pase3_p-Raf → p-Raf + Pase3                       | $kr20^y49$                                            | kr20       | 1.47E+02             | /s                        | fitted    |                                                                              |
| v68                                                           | Pase3_p-Raf → Raf + Pase3                         | $kc20^y49$                                            | kc20       | 9.98E+01             | /s                        | fitted    |                                                                              |
| v69                                                           | pp-MEK + Pase4 → pp-MEK + Pase4                   | $kf21^y39^y50$                                        | kf21       | 3.70E-06             | /molecules/s              | fitted    | Dephosphorylation of pp-MEK                                                  |
| v70                                                           | Pase4_pp-MEK → p-MEK + Pase4                      | $kr21^y51$                                            | kr21       | 2.42E+03             | /s                        | fitted    |                                                                              |
| v71                                                           | Pase4_pp-MEK → p-MEK + Pase4                      | $kc21^y51$                                            | kc21       | 2.42E+02             | /s                        | fitted    |                                                                              |
| v72                                                           | p-MEK + Pase4 → p-MEK + Pase4                     | $kf22^y37^y50$                                        | kf22       | 6.89E-04             | /molecules/s              | fitted    | Dephosphorylation of p-MEK                                                   |
| v73                                                           | Pase4_p-MEK → p-MEK + Pase4                       | $kr22^y52$                                            | kr22       | 2.96E+02             | /s                        | fitted    |                                                                              |
| v74                                                           | Pase4_p-MEK → MEK + Pase4                         | $kc22^y52$                                            | kc22       | 5.98E+00             | /s                        | fitted    |                                                                              |
| v75                                                           | pp-ERK + DUSP → pp-ERK + DUSP                     | $kf23^y44^y53$                                        | kf23       | 2.43E-04             | /molecules/s              | fitted    | Dephosphorylation of pp-ERK by DUSP                                          |
| v76                                                           | DUSP_pp-ERK → p-ERK + DUSP                        | $kr23^y54$                                            | kr23       | 3.94E+01             | /s                        | fitted    |                                                                              |
| v77                                                           | DUSP_pp-ERK → p-ERK + DUSP                        | $kc23^y54$                                            | kc23       | 3.10E+02             | /s                        | fitted    |                                                                              |
| v78                                                           | p-ERK + DUSP → p-ERK + DUSP                       | $kf24^y42^y53$                                        | kf24       | 5.51E-05             | /molecules/s              | fitted    | Dephosphorylation of p-ERK by DUSP                                           |
| v79                                                           | DUSP_p-ERK → p-ERK + DUSP                         | $kr24^y55$                                            | kr24       | 2.18E+00             | /s                        | fitted    |                                                                              |
| v80                                                           | DUSP_p-ERK → ERK + DUSP                           | $kc24^y55$                                            | kc24       | 2.07E+01             | /s                        | fitted    |                                                                              |
| <b>Transcription regulatory network for PHLDA1 expression</b> |                                                   |                                                       |            |                      |                           |           |                                                                              |
| v81                                                           | pp-ERK + p-RSK → c-Fos synthesis                  | $Vcfo\{y44^y47\} / (Kcfo + \{y44^y47\})$              | Vcfo       | 2.42E+04             | molecules/s               | fitted    | Synthesis of c-Fos promoted by both pp-ERK- and p-RSK [1]                    |
| v82                                                           | c-Fos → degradation                               | $d\_cfo\{y56$                                         | d_cfo      | 2.59E+12             | molecules <sup>2</sup> /s | fitted    | Degradation of c-Fos                                                         |
| v83                                                           | c-Fos → PHLDA1 synthesis                          | $Vphlda1$                                             | Vphlda1    | 1.91E-04             | /s                        | fitted    | Basal synthesis of PHLDA1                                                    |
| v84                                                           | c-Fos & p-Akt → PHLDA1 synthesis                  | $s\_phlda1^{\{y19^y56\}}$                             | s_phlda1   | initial_y57_d_pht ↑  | molecules/s               | fitted    | Synthesis of PHLDA1 promoted by both pAkt and c-Fos                          |
| v85                                                           | PHLDA1 → degradation                              | $d\_phlda1^y57$                                       | d_phlda1   | 1.00E-05             | /s                        | fitted    | Degradation of PHLDA1                                                        |
| v86                                                           | pHRGR_pErbB2 & (pHRGR_pErbB2)_2 → PTPN synthesis  | $Vptpn^{\{y6+y9\}} / (Kptpn + \{y6+y9\})$             | Vptpn      | 3.05E+02             | molecules/s               | fitted    | Synthesis of PTPN promoted by pHRGR_pErbB2 dimer and tetramer                |
| v87                                                           | PTPN → degradation                                | $d\_ptpn^y58$                                         | d_ptpn     | 8.11E+04             | molecules                 | fitted    | Degradation of PTPN                                                          |
| v88                                                           | pp-ERK + DUSP → DUSP synthesis                    | $Vdusp$                                               | Vdusp      | 1.76E-05             | /s                        | fitted    | Basal synthesis of DUSP                                                      |
| v89                                                           | pp-ERK → DUSP synthesis                           | $s\_dusp^y44$                                         | s_dusp     | initial_y53_d_dusp ↑ | molecules/s               | fitted    | Synthesis of DUSP promoted by pp-ERK                                         |
| v90                                                           | DUSP → degradation                                | $d\_dusp^y53$                                         | d_dusp     | 7.55E-03             | /s                        | fitted    | Degradation of DUSP                                                          |

† Synthetic constants of DUSP and PHLDA1 were calculated from randomly selected initial values in the simulation with cell-to-cell variability.

[1] Nakakuki et al., Cell, 141, 884-896 (2010)

Table S7. Initial concentration of molecules in the expanded model

| Symbol | Species              | Molecules/cell | Reference                                                                                                                  |
|--------|----------------------|----------------|----------------------------------------------------------------------------------------------------------------------------|
| HRG    | Concentration of HRG | 10 (uM)        | Experimental condition in this study                                                                                       |
| y1     | HRGR                 | 10000          | We regard ErbB3 as HRG receptor (HRGR) in this study.<br>Number of ErbB3 receptors is below 10,000 molecules per cell [1]. |
| y2     | HRGR_ErbB2           | 0              |                                                                                                                            |
| y3     | HRG:HRGR             | 0              |                                                                                                                            |
| y4     | HRG:HRGR_ErbB2       | 0              |                                                                                                                            |
| y5     | pHRGR_pErbB2         | 0              |                                                                                                                            |
| y6     | (pHRGR_pErbB2)2      | 0              |                                                                                                                            |
| y7     | PI3K                 | 669000         | fitted                                                                                                                     |
| y8     | pE2pE3_PI3K          | 0              |                                                                                                                            |
| y9     | (pE2pE3)2_PI3K       | 0              |                                                                                                                            |
| y10    | active_PI3K          | 0              |                                                                                                                            |
| y11    | PIP2                 | 7840000        | fitted                                                                                                                     |
| y12    | active_PI3K_PIP2     | 0              |                                                                                                                            |
| y13    | PIP3                 | 0              |                                                                                                                            |
| y14    | PDK1                 | 1520000        | fitted                                                                                                                     |
| y15    | PIP3_PDK1            | 0              |                                                                                                                            |
| y16    | p-PDK1               | 0              |                                                                                                                            |
| y17    | Akt                  | 338000         | fitted                                                                                                                     |
| y18    | p-PDK1_Akt           | 0              |                                                                                                                            |
| y19    | pAkt                 | 0              |                                                                                                                            |
| y20    | Pase1                | 213000         | fitted                                                                                                                     |
| y21    | Pase1_PI3KA          | 0              |                                                                                                                            |
| y22    | PTEN                 | 68300          | fitted                                                                                                                     |
| y23    | PTEN_PIP3            | 0              |                                                                                                                            |
| y24    | Pase2                | 674000         | fitted                                                                                                                     |
| y25    | Pase2_p-PDK1         | 0              |                                                                                                                            |
| y26    | PP2A                 | 2370           | fitted                                                                                                                     |
| y27    | PP2A_p-Akt           | 0              |                                                                                                                            |
| y28    | RasGDP               | 250000         | 400 nM per cell [2]                                                                                                        |
| y29    | pE2pE3_RasGDP        | 0              |                                                                                                                            |
| y30    | (pE2pE3)2_RasGDP     | 0              |                                                                                                                            |
| y31    | RasGTP               | 0              |                                                                                                                            |
| y32    | Raf                  | 8000           | 13 nM per cell [2]                                                                                                         |
| y33    | RasGTP_Raf           | 0              |                                                                                                                            |
| y34    | p-Raf                | 0              |                                                                                                                            |
| y35    | MEK                  | 850000         | 1400 nM per cell [2]                                                                                                       |
| y36    | p-Raf_MEK            | 0              |                                                                                                                            |
| y37    | p-MEK                | 0              |                                                                                                                            |
| y38    | p-Raf_MEKP           | 0              |                                                                                                                            |
| y39    | pp-MEK               | 0              |                                                                                                                            |
| y40    | ERK                  | 600000         | 960 nM per cell [2]                                                                                                        |
| y41    | pp-MEK_ERK           | 0              |                                                                                                                            |
| y42    | p-ERK                | 0              |                                                                                                                            |
| y43    | pp-MEK_p-ERK         | 0              |                                                                                                                            |
| y44    | pp-ERK               | 0              |                                                                                                                            |
| y45    | RSK                  | 498000         | fitted                                                                                                                     |
| y46    | RSK_pp-ERK           | 0              |                                                                                                                            |
| y47    | p-RSK                | 0              |                                                                                                                            |
| y48    | Pase3                | 5930           | fitted                                                                                                                     |
| y49    | Pase3_p-Raf          | 0              |                                                                                                                            |
| y50    | Pase4                | 1920000        | fitted                                                                                                                     |
| y51    | Pase4_pp-MEK         | 0              |                                                                                                                            |
| y52    | Pase4_p-MEK          | 0              |                                                                                                                            |
| y53    | DUSP                 | 10000          | fitted                                                                                                                     |
| y54    | DUSP_pp-ERK          | 0              |                                                                                                                            |
| y55    | DUSP_p-ERK           | 0              |                                                                                                                            |
| y56    | c-Fos                | 0              |                                                                                                                            |
| y57    | PHLDA1               | 60000          | fitted                                                                                                                     |
| y58    | Phosphatase          | 0              |                                                                                                                            |
| y59    | ErbB2                | 8000           | Number of ErbB2 receptors is below 10,000 molecules per cell [1].                                                          |

[1] Zhang, Q. et al., Proc. Natl. Acad. Sci. USA 109, 13237–13242 (2012).

[2] Fujioka, A. et al., J. Biol. Chem., 281, 8917–8926 (2006).

Table S8. CV of molecules in the expanded model

| <b>Species</b> | <b>CV of protein concentrations (%)</b> | <b>Reference</b>                    |
|----------------|-----------------------------------------|-------------------------------------|
| HRGR (ErbB3)   | 31                                      |                                     |
| ErbB2          | 42                                      | Measured in this study<br>(Fig. 3D) |
| Akt            | 39                                      |                                     |
| ERK            | 35                                      |                                     |
| PHLDA1         | 60                                      |                                     |
| Others         | 35                                      | Typical order [1, 2]                |

[1] Meyer, R. et al., *Frontiers in physiology*, 3, 451-451 (2011).

[2] Spencer, S. et al., *Nature* 459.7245, 428-432 (2009).



Table S9. Rank correlations in the expanded model

| <b>Combination</b> | <b>Rank correlation</b> | <b>Reference</b>                    |
|--------------------|-------------------------|-------------------------------------|
| HRGR(ErbB3)-PHLDA1 | 0.13                    | Measured in this study<br>(Fig. 3F) |
| ErbB2_PHLDA1       | 0.27                    |                                     |
| ERK-PHLDA1         | 0.15                    |                                     |
| Akt-PHLDA1         | 0.14                    |                                     |
